# Supplementary material for: Graphene Oxide/Polyethyleneimine-Modified Cation Exchange Membrane for Efficient Selective Recovery of Ammonia Nitrogen from Wastewater
Source: MDPI journal article supplement (doi:10.3390/membranes13080726), 2023-08-10
Supplement: s1 [file s1]

## **Supporting Information**

### ***Graphene oxide / polyethyleneimine modified cation exchange membrane for efficient selective recovery of ammonia nitrogen from wastewater***

Yuanyuan Yu<sup>a</sup>, Qin Zeng<sup>a</sup>, Haoquan Zhang<sup>a</sup>, Maoqin Ao<sup>a</sup>, Jingmei Yao<sup>a</sup>, Chun Yang<sup>a</sup>,  
Svetlozar Velizarov<sup>b\*</sup>, Le Han<sup>a\*</sup>

<sup>a</sup> *Key Laboratory of the Three Gorges Reservoir Region's Eco-Environment, Ministry of Education, College of Environment and Ecology, Chongqing University, Chongqing 400045, China.*

<sup>b</sup> *LAQV / REQUIMTE, Department of Chemistry, NOVA School of Science and Technology, FCT NOVA, Universidade NOVA de Lisboa, 2829-516 Caparica, Portugal.*

**\*Corresponding authors:** Svetlozar Velizarov, Universidade NOVA de Lisboa, Portugal; Le Han, Chongqing University, China.

**E-mail addresses:** [s.velizarov@fct.unl.pt](mailto:s.velizarov@fct.unl.pt) (S. Velizarov); [lehan@cqu.edu.cn](mailto:lehan@cqu.edu.cn) (L. Han)

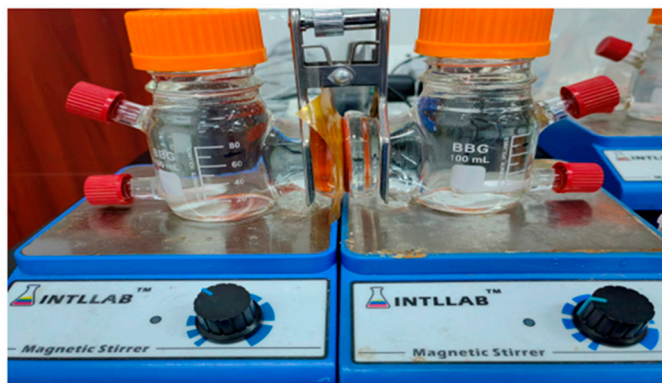

**Figure S1.** Photograph of the Donnan dialysis unit used.

**Table S1.** Design of ionic concentration investigations

| Liquid <sup>a</sup> concentration (mM) |      | Membrane type | Sampling interval time (h) | Running times (h) |
|----------------------------------------|------|---------------|----------------------------|-------------------|
| NH <sub>4</sub> Cl                     | NaCl |               |                            |                   |
| 5                                      | 10   | CEM           | 1                          | 9                 |
| 10                                     | 20   |               |                            |                   |
| 25                                     | 50   |               |                            |                   |
| 50                                     | 100  |               |                            |                   |

<sup>a</sup> NH<sub>4</sub>Cl is the feed solution and NaCl is the receiving solution.

**Table S2.** Design of of deposition conditions

| Deposition conditions |          | Membrane type | Liquid type              |            | Sampling interval time (h) | Running time (h) |
|-----------------------|----------|---------------|--------------------------|------------|----------------------------|------------------|
| Time (min)            | Material |               | Feed                     | Receiving  |                            |                  |
| 0                     |          |               |                          |            |                            |                  |
| 5                     |          |               |                          |            |                            |                  |
| 15                    |          |               |                          |            |                            |                  |
| 20                    | GO-PEI   |               | 25 mM NH <sub>4</sub> Cl |            |                            |                  |
| 30                    |          |               | or                       | 50 mM NaCl |                            |                  |
| 40                    |          |               | 2.5 mM MgCl <sub>2</sub> |            |                            |                  |
| 5                     |          |               |                          |            |                            |                  |
| 20                    | PEI      |               |                          |            |                            |                  |
| 40                    |          | CEM           |                          |            | 1                          | 9                |
| 0                     |          |               |                          |            |                            |                  |
| 5                     |          |               |                          |            |                            |                  |
| 15                    |          |               |                          |            |                            |                  |
| 20                    | GO-PEI   |               | 25 mM NH <sub>4</sub> Cl |            |                            |                  |
| 30                    |          |               | and                      | 50 mM NaCl |                            |                  |
| 40                    |          |               | 2.5 mM MgCl <sub>2</sub> |            |                            |                  |
| 5                     |          |               |                          |            |                            |                  |
| 20                    | PEI      |               |                          |            |                            |                  |
| 40                    |          |               |                          |            |                            |                  |

**Table S3.** Exploratory design of the effect of Mg<sup>2+</sup> concentration

| Liquid concentration (mM) |                   |           | C[NH <sub>4</sub> <sup>+</sup> ] : C[Mg <sup>2+</sup> ] | Membrane type | Sampling interval time (h) | Running time (h) |
|---------------------------|-------------------|-----------|---------------------------------------------------------|---------------|----------------------------|------------------|
| Feed                      |                   | Receiving |                                                         |               |                            |                  |
| NH <sub>4</sub> Cl        | MgCl <sub>2</sub> | NaCl      |                                                         |               |                            |                  |
| 25                        | 2.5               | 50        | 10:1                                                    | GO-PEI        |                            |                  |
| 25                        | 12.5              | 50        | 2:1                                                     | membrane/     | 1                          | 9                |
|                           |                   |           |                                                         | PEI membrane/ |                            |                  |
| 25                        | 25                | 50        | 1:1                                                     | CEM           |                            |                  |

**Table S4.** EDS scan data for membrane surfaces and cross-sections

| Membrane type | Elemental content (%) |       |      |       |               |       |      |       |
|---------------|-----------------------|-------|------|-------|---------------|-------|------|-------|
|               | Surface               |       |      |       | Cross-section |       |      |       |
|               | C                     | O     | S    | N     | C             | O     | S    | N     |
| Control       | 73.56                 | 17.88 | 7.39 | 0.00  | 68.97         | 19.99 | 3.91 | 1.81  |
| GO-PEI (5)    | 72.64                 | 10.11 | 6.87 | 5.77  | 67.13         | 10.66 | 2.34 | 12.31 |
| GO-PEI (20)   | 64.92                 | 16.37 | 4.11 | 11.38 | 60.99         | 12.97 | 1.98 | 20.68 |
| PEI (20)      | 66.96                 | 14.02 | 5.08 | 9.79  | 63.91         | 16.46 | 3.60 | 12.30 |

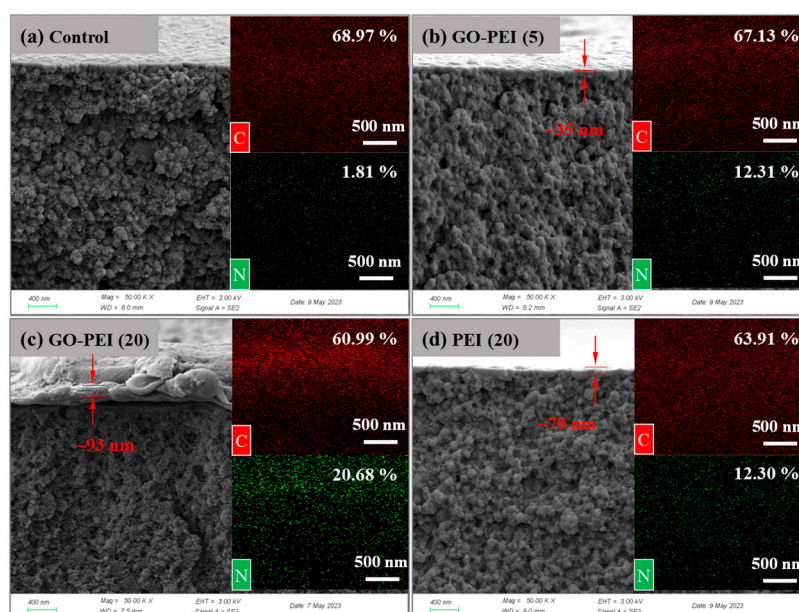

**Figure S2.** SEM and EDS scans of C (red) and N (green) elements images of (a) control membrane, (b) GO-PEI (5) membrane, (c) GO-PEI (20) membrane and (d) PEI (20) membrane cross-section.

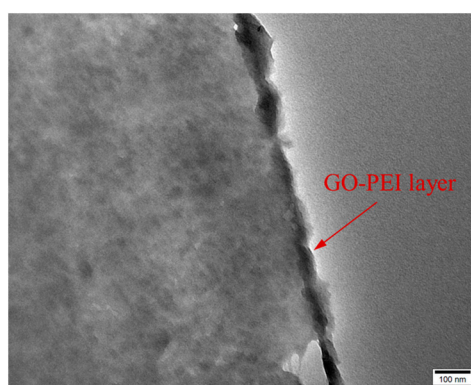

**Figure S3.** A TEM image of a cross-sectional section of the GO-PEI (20) membrane.
